# Supplementary material
Source: PubMed Central journal article supplement (PMC3809337)
Supplement: NIHMS514919-supplement-01.pdf [file NIHMS514919-supplement-01.pdf]

## Supplemental Experimental Procedures

**Nest design:** It is essential that the nest is completely opaque and has a large enough entrance to allow easy access for the mouse. A red plexiglass nest was ineffective, as the animals seemed unable to locate the entrance. When the entrance of the nest was too narrow, mice preferred to run to a corner instead.

**Animal handling:** Each animal was acclimated to the arena for 10 minutes before stimulus display. This ensured that the animal had enough time to explore the arena and familiarize himself with the nest, while still remaining alert. When stimuli were presented after 40 minutes of acclimation the reactions were weaker. Each animal was returned to a new cage after being in the arena, to prevent any interaction between tested and naïve mice. We commonly heard animals vocalizing in their cage after being tested. At the end of an experimental day all animals were returned to their home cages. The arena was cleaned with ethanol wipes between mice.

**Habituation:** We did observe an increase in flight latencies when the animals encountered the same stimulus twice over different days. Therefore, the reported results are all from the first encounter of a mouse with the stimulus.
